# Supplementary material for: PEPlife: A Repository of the Half-life of Peptides
Source: PubMed Central journal article supplement (PMC5098197; doi:10.1038/srep36617), 2016-11-07
Supplement: srep36617-s1.pdf [file srep36617-s1.pdf]

## **PEPlife: A Repository of the Half-life of Peptides**

**Deepika Mathur<sup>1</sup>, Satya Prakash<sup>1,+,\$</sup>, Priya Anand<sup>1,+</sup>, Harpreet Kaur<sup>1</sup>, Piyush Agrawal<sup>1</sup>, Ayesha Mehta<sup>1</sup>, Rajesh Kumar<sup>1</sup>, Sandeep Singh<sup>1</sup>, Gajendra P.S. Raghava<sup>1,\*</sup>**

<sup>1</sup>Bioinformatics Centre, CSIR-Institute of Microbial Technology, Chandigarh, India

<sup>\$</sup>Present address- TIFR Centre for Interdisciplinary Sciences, Tata Institute of Fundamental Research, Narsingi, Hyderabad 500075, India

\*Correspondence and requests for materials should be addressed to G.P.S.R. (email: [raghava@imtech.res.in](mailto:raghava@imtech.res.in))

<sup>+</sup> These authors contributed equally to this work.

## Supplementary Information:

**Supplementary Table S1:** Examples to show the effects of modifications on half-life of peptides. Details of these peptides with clickable links are available at PEPLife database (<http://crdd.osdd.net/raghava/peplife>).

| PEPLife ID | Name                                                                                              | Sequence                                               | N-terminal modification | C-terminal modification | Chemical Modification | Linear /Cyclic | Chirality | Half-life (seconds) | Tissue sample | Patent/ PMID |
|------------|---------------------------------------------------------------------------------------------------|--------------------------------------------------------|-------------------------|-------------------------|-----------------------|----------------|-----------|---------------------|---------------|--------------|
| 2866       | GRF(1-29)-NH <sub>2</sub> (Growth regulating factor)                                              | YADAIFTNS<br>YRKVLGQL<br>SARKLLQDI<br>MSR              | Free                    | Amidation               | None                  | Linear         | L         | 372                 | Rat plasma    | 2896343      |
| 2867       | [D-Ala <sup>2</sup> ]-GRF(1-29)-NH <sub>2</sub> (Growth regulating factor)                        | YaDAIFTNS<br>YRKVLGQL<br>SARKLLQDI<br>MSR              | Free                    | Amidation               | None                  | Linear         | Mix       | 396                 | Rat plasma    | 2896343      |
| 2868       | [D-Asp <sup>3</sup> ]-GRF(1-29)-NH <sub>2</sub> (Growth regulating factor)                        | YAdAIFTNS<br>YRKVLGQL<br>SARKLLQDI<br>MSR              | Free                    | Amidation               | None                  | Linear         | Mix       | 354                 | Rat plasma    | 2896343      |
| 2869       | ID-Asn <sup>8</sup> ]-GRF(1-29)-NH <sub>2</sub> (Growth regulating factor)                        | YADAIFTnS<br>YRKVLGQL<br>SARKLLQDI<br>MSR              | Free                    | Amidation               | None                  | Linear         | Mix       | 414                 | Rat plasma    | 2896343      |
| 2870       | [D-Tyr <sup>10</sup> ]-GRF(1-29)-NH <sub>2</sub> (Growth regulating factor)                       | YADAIFTNS<br>yRKVLGQL<br>SARKLLQDI<br>MSR              | Free                    | Amidation               | None                  | Linear         | Mix       | 282                 | Rat plasma    | 2896343      |
| 2871       | Ac-[D-Tyr <sup>1</sup> ,D-Ala <sup>2</sup> ]-GRF(1-29)-NH <sub>2</sub> (Growth regulating factor) | yaDAIFTNS<br>YRKVLGQL<br>SARKLLQDI<br>MSR              | Acetylation             | Amidation               | None                  | Linear         | Mix       | 444                 | Rat plasma    | 2896343      |
| 1790       | T-1249                                                                                            | WQEWQKI<br>TALLEQAQI<br>QQEKNEYE<br>LQKLDKW<br>ASLWEWF | Free                    | Free                    | None                  | Linear         | L         | 21240               | Monkey blood  | 17640899     |
| 2215       | T-1249                                                                                            | WQEWQKI<br>TALLEQAQI<br>QQEKNEYE<br>LQKLDKW<br>ASLWEWF | Acetylation             | Amidation               | None                  | Linear         | L         | 19980               | Monkey blood  | US6656906    |
| 2903       | DSIP (Delta sleep inducing peptide)                                                               | WAGGDAS<br>GE                                          | Free                    | Free                    | None                  | Linear         | L         | 434.4               | Dog plasma    | 3768731      |
| 2906       | D-Ala <sup>4</sup> -DSIP                                                                          | WAGaDASG<br>E                                          | Free                    | Free                    | None                  | Linear         | Mix       | 774                 | Dog plasma    | 3768731      |
| 2907       | D-Ala <sup>4</sup> -DSIP-NH <sub>2</sub>                                                          | WAGaDASG<br>E                                          | Free                    | Amidation               | None                  | Linear         | Mix       | 612                 | Dog plasma    | 3768731      |
| 2905       | D-Ala <sup>3</sup> -DSIP                                                                          | WAaGDASG<br>E                                          | Free                    | Free                    | None                  | Linear         | Mix       | 491.4               | Dog plasma    | 3768731      |
| 2639       | O-1(Oncocin)                                                                                      | VDKPPYLP<br>RPRPPRIY<br>NR                             | Free                    | Amidation               | None                  | Linear         | L         | 1500                | Mouse serum   | 21185160     |
| 2648       | O-11 (Oncocin)                                                                                    | VDKPPYLP<br>RPRPPRIY<br>Nr                             | Free                    | Amidation               | None                  | Linear         | Mix       | 9600                | Mouse serum   | 21185160     |
| 2652       | O-16 (Oncocin)                                                                                    | VDKPPYLP<br>RPRPPRIY<br>NR                             | Free                    | Amidation               | None                  | Linear         | Mix       | 3480                | Mouse serum   | 21185160     |
| 2660       | O-24 (Oncocin)                                                                                    | VDKPPYLP                                               | Free                    | Amidation               | None                  | Linear         | Mix       | 28800               | Mouse         | 2118516      |

|      |                            |                                                        |             |           |                                    |                                                 |     |       |                 |                 |
|------|----------------------------|--------------------------------------------------------|-------------|-----------|------------------------------------|-------------------------------------------------|-----|-------|-----------------|-----------------|
|      |                            | RPRPPRrIY<br>Nr                                        |             |           |                                    |                                                 |     |       | serum           | 0               |
| 2641 | O-4 (Oncocin)              | VDKPPYLP<br>RPRPPRrIY<br>NN                            | Free        | Amidation | None                               | Linear                                          | L   | 7200  | Mouse<br>serum  | 2118516<br>0    |
| 2650 | O-14 (Oncocin)             | VDKPPYLP<br>RPRPPR-<br>Orn-IYNR                        | Free        | Amidation | Orn=Ornithin<br>e                  | Linear                                          | L   | 5400  | Mouse<br>serum  | 2118516<br>0    |
| 2659 | O-23(Oncocin)              | VDKPPYLP<br>RPRPPR-<br>Orn-IYN-Orn                     | Free        | Amidation | Orn=Ornithin<br>e                  | Linear                                          | L   | 10560 | Mouse<br>serum  | 2118516<br>0    |
| 1006 | Com1                       | RRWWRF                                                 | Free        | Free      | None                               | Linear                                          | L   | 1800  | Human<br>serum  | 2084476<br>5    |
| 1012 | Com2                       | RRWWRF                                                 | Free        | Amidation | None                               | Linear                                          | L   | 1800  | Human<br>serum  | 2084476<br>5    |
| 1018 | Com3                       | RRWWRF                                                 | Acetylation | Free      | None                               | Linear                                          | L   | 3600  | Human<br>serum  | 2084476<br>5    |
| 1024 | Com4                       | RRWWRF                                                 | Acetylation | Amidation | None                               | Linear                                          | L   | 5400  | Human<br>serum  | 2084476<br>5    |
| 1030 | Com5                       | RRWWRF                                                 | Free        | Free      | None                               | Cyclic<br>(head-<br>to-tail<br>cycliza<br>tion) | L   | 86400 | Human<br>serum  | 2084476<br>5    |
| 1039 | Lfc7                       | RRWQWRM<br>KCLG                                        | Free        | Free      | None                               | Linear                                          | L   | 1800  | Human<br>serum  | 2084476<br>5    |
| 1045 | Lfc8                       | RRWQWRM<br>KCLG                                        | Free        | Free      | None                               | Cyclic<br>(head-<br>to-tail<br>cycliza<br>tion) | L   | 6600  | Human<br>serum  | 2084476<br>5    |
| 1094 | iAβ5p-C1                   | LPFFD                                                  | Free        | Amidation | None                               | Linear                                          | L   | 300   | Human<br>plasma | 1257883<br>0    |
| 1097 | iAβ5p                      | LPFFD                                                  | Free        | Free      | None                               | Linear                                          | L   | 900   | Human<br>plasma | 1257883<br>0    |
| 1216 | [Aib35]hGLP-<br>1(7-36)NH2 | HAEGTFTS<br>DVSSYLEG<br>QAAKEFIA<br>WLVK-Aib-<br>R     | Free        | Amidation | Aib=2-<br>aminoisobuty<br>ric acid | Linear                                          | L   | 66240 | Human<br>plasma | 2111459<br>9    |
| 1215 | [Aib8]hGLP-<br>1(7-36)NH2  | H-Aib-<br>EGTFTSDVS<br>SYLEGQAA<br>KEFIAWL<br>V<br>KGR | Free        | Amidation | Aib=2-<br>aminoisobuty<br>ric acid | Linear                                          | L   | 43560 | Human<br>plasma | 2111459<br>9    |
| 1107 | (Abu8)GLP-1                | H-Abu-<br>EGTFTSDVS<br>SYLEGQAA<br>KEFIAWL<br>V<br>KGR | Free        | Free      | Abu=2-<br>aminobutyric<br>acid     | Linear                                          | L   | 43200 | Human<br>plasma | 1524686<br>9    |
| 2413 | Octreotide                 | FCFWKTCT                                               | Free        | Free      | None                               | Cyclic<br>(C2-<br>C7)                           | L   | 6780  | Human<br>serum  | 7911441         |
| 2475 | Octreotide                 | fCFwKTCT                                               | Free        | Free      | None                               | Cyclic<br>(C2-<br>C7)                           | Mix | 5400  | Human<br>serum  | 8289671         |
| 1036 | Com6                       | CRRWWRF<br>C                                           | Free        | Amidation | None                               | Cyclic<br>(C1-<br>C8)                           | L   | 23400 | Human<br>serum  | 2084476<br>5    |
| 1042 | Com7                       | CRRWWRF<br>C                                           | Acetylation | Amidation | None                               | Cyclic<br>(C1-<br>C8)                           | L   | 23400 | Human<br>serum  | 2084476<br>5    |
| 2161 | Chimeric CNP-<br>C         | CFGLKLDRI<br>GSMSGLGC<br>VQQRKESK<br>KPPAKLQP<br>R     | Free        | Free      | None                               | Cyclic<br>(C1-<br>C17)                          | L   | 901.8 | Rat<br>blood    | EP22778<br>90A1 |
| 2167 | Chimeric CNP-I             | CFGLKLDRI<br>GSMSGLGC<br>VQQRKESK<br>KPPAKLQP<br>R     | Free        | Amidation | None                               | Cyclic<br>(C1-<br>C17)                          | L   | 870   | Rat<br>blood    | EP22778<br>90A1 |
| 1265 | GRF1-29                    | YADAIFTNS<br>YRKVLGQL                                  | Free        | Amidation | None                               | Linear                                          | L   | 900   | Human<br>plasma | 1449970<br>7    |

|      |                     |                                                        |                      |           |                                                        |        |   |        |                 |              |
|------|---------------------|--------------------------------------------------------|----------------------|-----------|--------------------------------------------------------|--------|---|--------|-----------------|--------------|
|      |                     | SARKLLQDI<br>MSR                                       |                      |           |                                                        |        |   |        |                 |              |
| 1266 | GRF-<br>1PEGLys12   | YADAIFTNS<br>YRKVLGQL<br>SARKLLQDI<br>MSR              | Free                 | Amidation | PEGylation<br>on Lys12                                 | Linear | L | 36000  | Human<br>plasma | 1449970<br>7 |
| 1268 | GRF-<br>1PEGLys21   | YADAIFTNS<br>YRKVLGQL<br>SARKLLQDI<br>MSR              | Free                 | Amidation | PEGylation<br>on Lys21                                 | Linear | L | 14400  | Human<br>plasma | 1449970<br>7 |
| 1745 | GLP-1               | HAEGTFTS<br>DVSSYLEG<br>QAAKEFIA<br>WLVKGR             | Free                 | Amidation | None                                                   | Linear | L | 156.6  | Rat<br>blood    | 1576909<br>2 |
| 1746 | PEG2k-Lys-<br>GLP-1 | HAEGTFTS<br>DVSSYLEG<br>QAAKEFIA<br>WLVKGR             | Free                 | Amidation | Pegylation at<br>Lysine                                | Linear | L | 2001.6 | Rat<br>blood    | 1576909<br>2 |
| 1761 | N-PEG/GLP-1         | HAEGTFTS<br>DVSSYLEG<br>QAAKEFIA<br>WLVKGR             | Pegylation at<br>His | Amidation | None                                                   | Linear | L | 453600 | Rat<br>plasma   | 1658606<br>4 |
| 2725 | TRI-1144            | TTWEAWD<br>RAIAEYAA<br>RIEALLRAL<br>QEQQEKNE<br>AALREL | Acetylation          | Amidation | None                                                   | Linear | L | 15120  | Rat<br>plasma   | 2590086<br>3 |
| 2726 | PEG-TRI-1144        | TTWEAWD<br>RAIAEYAA<br>RIEALLRAL<br>QEQQEKNE<br>AALREL | Acetylation          | Amidation | Conjugated<br>with<br>PEG(40KDa)<br>through Lys-<br>30 | Linear | L | 122400 | Rat<br>plasma   | 2590086<br>3 |
